# Supplementary material
Source: publisher figshare collection journal article supplement (https://rs.figshare.com/ndownloader/files/14331179)
Supplement: Supplementary file 1 [file 14331179]

**Supplemental Information**

The earliest equatorial record of frogs from the Late Triassic of Arizona

Michelle R. Stocker1,*, Sterling J. Nesbitt1, Ben T. Kligman1,2, Daniel J. Paluh3, Adam D. Marsh2, David C. Blackburn3, William G. Parker2

1Department of Geosciences, Virginia Tech, Blacksburg, VA 24061, United States of America

2Petrified Forest National Park, 1 Park Road, Petrified Forest, AZ 86028

3Florida Museum of Natural History, University of Florida, Gainesville, FL 32611

*corresponding author: stockerm@vt.edu

**Running Head:** Triassic Frog from Arizona

**Detailed Specimen, Locality, and Age Information**

*DMNH 2018-05 (‘Green site’ specimens)*

DMNH (Perot Museum of Nature and Science) 2018-05-0002: nearly complete right ilium – 6.47 mm long, 1.88 mm acetabulum width, 0.7 mm width of blade halfway from the acetabulum to the anterior tip. All measurements taken with digital calipers.

‘Green site’ (DMNH 2018-05): The DMNH specimen was collected from visually green (though 5YR 6/1 in Munsell system) conglomeratic lenses containing fish scales, coprolites, and coal that are mainly 20 cm thick (though in places up to 100 cm) within a fine-grained fluvial sandstone with low-angle cross laminations. The locality occurs within the Jim Camp Wash beds (Revueltian estimated holochronozone; ≤217.7 – 213.870 ± 0.078 Ma; (1, 2)) of the Sonsela Member, Chinle Formation southeast of Petrified Forest National Park in Apache County, Arizona.

*PEFO 396 (Coprolite layer specimens)*

PEFO (Petrified Forest National Park) 41743: partially complete left ilium – 2.01 mm long, 0.77 mm acetabulum width, 0.32 mm width of blade ~halfway from the acetabulum to the anterior tip.

Billings Gap Tank E (PFV 396): PEFO 41743 was collected from a 5-12 cm thick lacustrine siltstone lens containing abundant coprolites and vertebrate remains, located near Billings Gap in Petrified Forest National Park, Arizona. The vertebrate assemblage found at the 'coprolite layer' has been described elsewhere (3, 4). PFV 396 is in the upper part of the Blue Mesa Member of the Chinle Formation, and its age is estimated to be between 223.036 ± 0.059 and 220.123 ± 0.068 Ma (Adamanian estimated holochronozone; (2, 5)). The age of a laterally equivalent layer at PFV 122 is estimated at 221.946 Ma (6).

*MNA Placerias Quarry specimens*

MNA (Museum of Northern Arizona) V12365, fragmentary left ilium – 3.49 mm long, 2.01 mm acetabulum width; MNA V12366, fragmentary left ilium – 2.34 mm long, 1.49 mm acetabulum width; MNA V12369, posterior process of maxilla (side unknown) – 2.20 mm anterior-posterior length.

*Placerias* Quarry (MNA 207-2): MNA specimens were collected from a buff colored mudstone containing abundant vertebrate bone and carbonate nodules (7). A diverse assemblage of macrovertebrates and microvertebrates have been described from this locality including abundant remains of the large dicynodont synapsid *Placerias* (8, 9). MNA 207-2 is in strata located near St. Johns Arizona that are roughly equivalent to the Lots Wife Beds of the Sonsela Member of the Chinle Formation at Petrified Forest National Park based on U-Pb ages from detrital zircons in both places. The fossiliferous horizon is estimated to be 219.39 ± 0.16 Ma (Adamanian estimated holochronozone; (2, 10)).

**Collection and preparation methods**

The microfossil specimens described here were collected using two main methodologies. Those from DMNH 2018-05 and PFV 089 were collected by in-field splitting of quarried sandstone blocks and examination of bedding surfaces for microfossils using hand loupes. Any specimens found were then consolidated with either Paraloid B-72 (Rohm and Haas) or Butvar B-76, and additional preparation was completed under magnification with pinvises in the Fossil Preparation Laboratory at Virginia Tech. Stabilization of the matrix surrounding the specimens was assisted by use of Carbowax (Dow Chemical). The specimen from PFV 396 was collected by screen washing methods described previously (4). Five to ten-pound blocks of fossiliferous matrix were individually broken down in water and screened through a stack of five 8-inch diameter screens with decreasing aperture sizes of 6.33 mm, 4 mm, 2 mm, 1 mm, and 180 μm. The concentrated clasts from each block were then sorted under a dissecting microscope. Specimens collected from MNA 207-2 were collected by bulk screen washing methods described previously (9).

**Computed tomographic methods**

We generated digital three-dimensional models of DMNH 2018-05-0002 using x-ray computed microtomography (μCT-scanning) at the University of Florida’s Nanoscale Research Facility. For this characterization, we used a Phoenix v|tome|x M 240 (GE Measurement & Control, Boston, USA) scanner with a 180 kv x-ray tube and a diamond-tungsten target; settings for each of the scans is provided in Supplemental Table 1. Raw 2D x-ray data were processed using the datos|x software v. 2.3 with post-processing, analyses (including segmentation), and visualization conducted using VG StudioMax v. 3.1 (Volume Graphics, Heidelberg, Germany). Both image stacks (TIFF) and surface mesh files of the ilia are available via MorphoSource (see Supplementary Table 1 for DOIs).

**Scanning electron microscope images**

We imaged MNAV12369 using a Hitachi tm3000 tabletop scanning electron microscope. Specifically, this allowed us to capture the detail of the pedicellate teeth and maxillary structure (SFig. 1).

**Justification for Identification of MNA V12369 to Anura**

We refer the maxillary fragment MNA V12369 to Anura based on the presence of pedicellate tooth bases (SFig. 1; (11)), similar to those figured by (12). The tooth bases are attached to a prominent sub-dental shelf. The labial surface of this element is smooth and unornamented.

**Caption for Supplementary Figure 1**

Comparisons among the Late Triassic anuran specimens from the Chinle Formation. Top row: photograph (a) and CT images of lateral, posterior, medial, and anterior views (b-e) of the ilium DMNH-2018-05-0002. Middle row: lateral and medial views of the ilia PEFO 41743, MNA V12366, and MNA V12365. Bottom row: SEM images (l, n) and photograph (m) of MNA V12369. (l) lingual, (m) labial, and (n) occlusal views of MNA V12369. All scale bars equal 1.0 mm.

**Supplementary References**

1. Martz JW, Parker WG. Revised formulation of the Late Triassic Land Vertebrate “Faunachrons” of western North America: recommendations for codifying nascent systems of vertebrate biochronology. Terrestrial Depositional Systems: Elsevier; 2017. p. 39-125.

2. Ramezani J, Hoke GD, Fastovsky DE, Bowring SA, Therrien F, Dworkin SI, et al. High-precision U-Pb zircon geochronology of the Late Triassic Chinle Formation, Petrified Forest National Park (Arizona, USA): temporal constraints on the early evolution of dinosaurs. Geological Society of America Bulletin. 2011;123(11/12):2142-59.

3. Kligman BT, Marsh AD, Parker WG. First records of diapsid *Palacrodon* from the Norian, Late Triassic Chinle Formation of Arizona, and their biogeographic implications. Acta Palaeontologica Polonica. 2018;63(1):117-27.

4. Kligman BT, Parker WG, Marsh AD. First record of *Saurichthys* (Actinopterygii) from the Upper Triassi (Chinle Formation, Norian) of western North America. Journal of Vertebrate Paleontology. 2017;37:e1367304.

5. Atchley SC, Nordt LC, Dworkin SI, Ramezani J, Parker WG, Ash SR, et al. A linkage among Pangean tectonism, cyclic alluviation, climate change, and biologic turnover in the Late Triassic: the record from the Chinle Formation, southwestern United States. Journal of Sedimentary Research. 2013;83:1147-61.

6. Nordt LC, Atchley SC, Dworkin SI. Collapse of the Late Triassic megamonsoon in western equatorial Pangea, present-day American Southwest. Geological Society of America Bulletin. 2015;127(11-12):1798-815.

7. Fiorillo AR, Padian K, Musikasinthorn C. Taphonomy and depositional setting of the *Placerias* Quarry (Chinle Formation: Late Triassic, Arizona). Palaios. 2000;15:373-86.

8. Camp CL, Welles SP. Triassic dicynodont reptiles. Memoirs of the University of California. 1956;13(4):255-348.

9. Kaye FT, Padian K. Microvertebrates from the *Placerias* Quarry: a window on the Late Triassic vertebrate diversity in the American Southwest. In: Fraser NC, Sues H-D, editors. In the Shadow of the Dinosaurs: Early Mesozoic Tetrapods. Cambridge: Cambridge University Press; 1994. p. 171-96.

10. Ramezani J, Fastovsky DE, Bowring SA. Revised chronostratigraphy of the lower Chinle Formation strata in Arizona and New Mexico (USA): high-precision U-Pb geochronological constraints on the Late Triassic evolution of dinosaurs. American Journal of Science. 2014;314:981-1008.

11. Carroll RL. The Rise of Amphibians: 365 million years of evolution. Baltimore: The Johns Hopkins University Press; 2009. 360 p.

12. Roček Z, Eaton JG, Gardner J, Přikryl T. Evolution of anuran assemblages in the Late Cretaceous of Utah, USA. Palaeobiodiversity and Palaeoenvironments. 2010;90(4):341-93.
